# Supplementary material for: Identification of Pou5f1, Sox2, and Nanog downstream target genes with statistical confidence by applying a novel algorithm to time course microarray and genome-wide chromatin immunoprecipitation data
Source: PubMed Central journal article supplement (PMC2424064; doi:10.1186/1471-2164-9-269), 2008-06-03
Supplement: 1471-2164-9-269-S1.pdf [file 1471-2164-9-269-S1.pdf]

| Transcription factors | Genome-wide gene expression profiles                                                                                                                                                                                                                                                                                                                                                     | Genome-wide chromatin immunoprecipitation (ChIP) assays                                                                                                                                                             |
|-----------------------|------------------------------------------------------------------------------------------------------------------------------------------------------------------------------------------------------------------------------------------------------------------------------------------------------------------------------------------------------------------------------------------|---------------------------------------------------------------------------------------------------------------------------------------------------------------------------------------------------------------------|
| Pou5f1 (Oct3/4, Oct4) | <ul style="list-style-type: none"> <li>• Repression of Pou5f1 by tetracycline-controllable Pou5f1 in ZHBTc4 ES cells (mouse: Matoba et al., 2007)</li> <li>• Repression of Pou5f1 by tetracycline-controllable Pou5f1 in ZHBTc4 ES cells (mouse: new data for 0, 3, 6, 12, 24 hrs)</li> </ul>                                                                                            | <ul style="list-style-type: none"> <li>• ChIP-PET for Pou5f1 (mouse: Loh et al., 2006)</li> <li>• ChIP-PET for Nanog (mouse: Loh et al., 2006)</li> </ul>                                                           |
| Nanog                 | <ul style="list-style-type: none"> <li>• Repression of Nanog by shRNA (mouse: Ivanova et al., 2006)</li> <li>• Repression of Nanog by shRNA (mouse: Loh et al., 2006)</li> <li>• Overexpression of Nanog by a Nanog-transgene integrated into the genome in ES cells (mouse: new data)</li> <li>• Overexpression of Nanog by an episomal vector in ES cells (mouse: new data)</li> </ul> | <ul style="list-style-type: none"> <li>• ChIP-PET for Pou5f1 (mouse: Loh et al., 2006)</li> <li>• ChIP-PET for Nanog (mouse: Loh et al., 2006)</li> </ul>                                                           |
| Sox2                  | <ul style="list-style-type: none"> <li>• Repression of Sox2 by tetracycline-controllable Sox2 (mouse: Masui et al., 2007)</li> </ul>                                                                                                                                                                                                                                                     | <ul style="list-style-type: none"> <li>• ChIP-PET for Pou5f1 (mouse: Loh et al., 2006)</li> <li>• ChIP-PET for Nanog (mouse: Loh et al., 2006)</li> <li>• ChIP-chip for Sox2 (human: Boyer et al., 2005)</li> </ul> |

**Additional file 1. Summary of data used in this study**
