# Supplementary material for: Identification of Pou5f1, Sox2, and Nanog downstream target genes with statistical confidence by applying a novel algorithm to time course microarray and genome-wide chromatin immunoprecipitation data
Source: PubMed Central journal article supplement (PMC2424064; doi:10.1186/1471-2164-9-269), 2008-06-03
Supplement: 1471-2164-9-269-S10.pdf [file 1471-2164-9-269-S10.pdf]

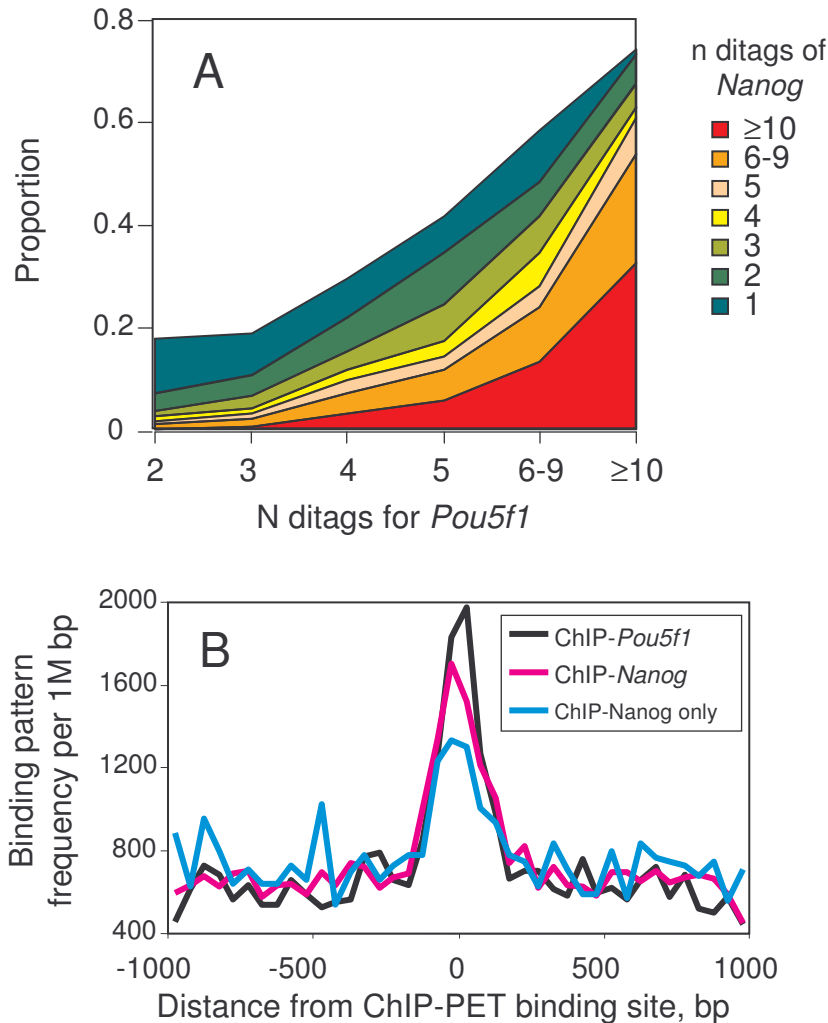

**Additional file 10. Co-localization of POU5F1 and NANOG binding sites in the mouse genome based on ChIP-PET data from [1].**

(A) Proportion of ChIP-POU5F1 regions with different number of ditags that were co-localized (within 1 Kb) with ChIP-NANOG regions (number of ditags indicates binding strength); (B) Density distribution of OCT-SOX composite binding motifs at various distances from the binding site identified with ChIP-PET [1] estimated for groups of genes with  $\geq 4$  POU5F1 ditags, with  $\geq 4$  NANOG ditags, and with  $\geq 4$  NANOG ditags and no POU5F1 ditags. Search for binding motifs was done using components of CisView software [17], which combines pattern-matching and position-weight matrix (PWM) approaches. PWM for OCT-SOX composite binding site was taken from [1].
