# Supplementary material for: Identification of Pou5f1, Sox2, and Nanog downstream target genes with statistical confidence by applying a novel algorithm to time course microarray and genome-wide chromatin immunoprecipitation data
Source: PubMed Central journal article supplement (PMC2424064; doi:10.1186/1471-2164-9-269), 2008-06-03
Supplement: 1471-2164-9-269-S20.pdf [file 1471-2164-9-269-S20.pdf]

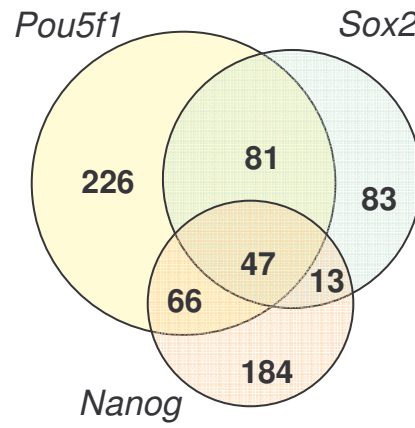

**Additional file 20. Venn diagram of tentative target genes (TTGs) of POU5F1, SOX2, and NANOG**
