# Supplementary material for: Identification of Pou5f1, Sox2, and Nanog downstream target genes with statistical confidence by applying a novel algorithm to time course microarray and genome-wide chromatin immunoprecipitation data
Source: PubMed Central journal article supplement (PMC2424064; doi:10.1186/1471-2164-9-269), 2008-06-03
Supplement: 1471-2164-9-269-S23.pdf [file 1471-2164-9-269-S23.pdf]

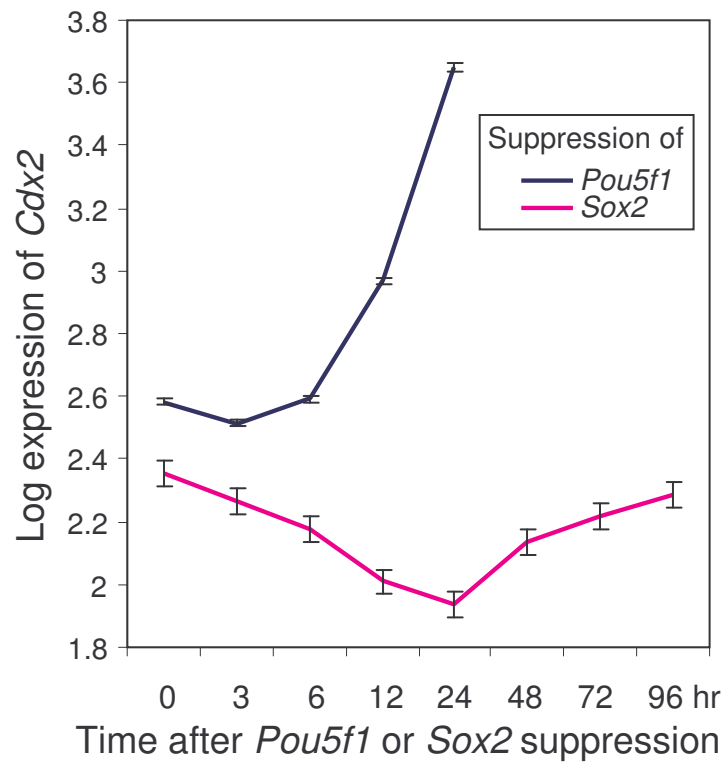

**Additional file 23. Expression change of *Cdx2* after suppression of *Pou5f1* and *Sox2* analyzed using quantitative RT-PCR (SE estimated with ANOVA)**
